# Supplementary material for: Aardwarmte interessante energie-optie
Source: Hindawi journal article supplement (doi:10.1155/2012/285481), 2005-01-01

A.

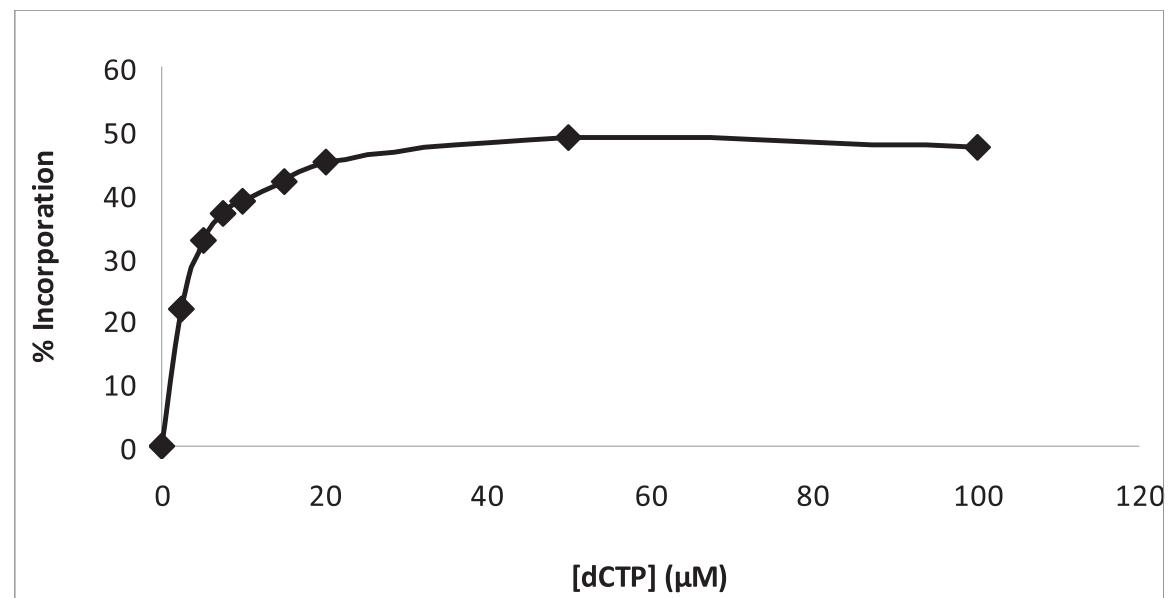

B.

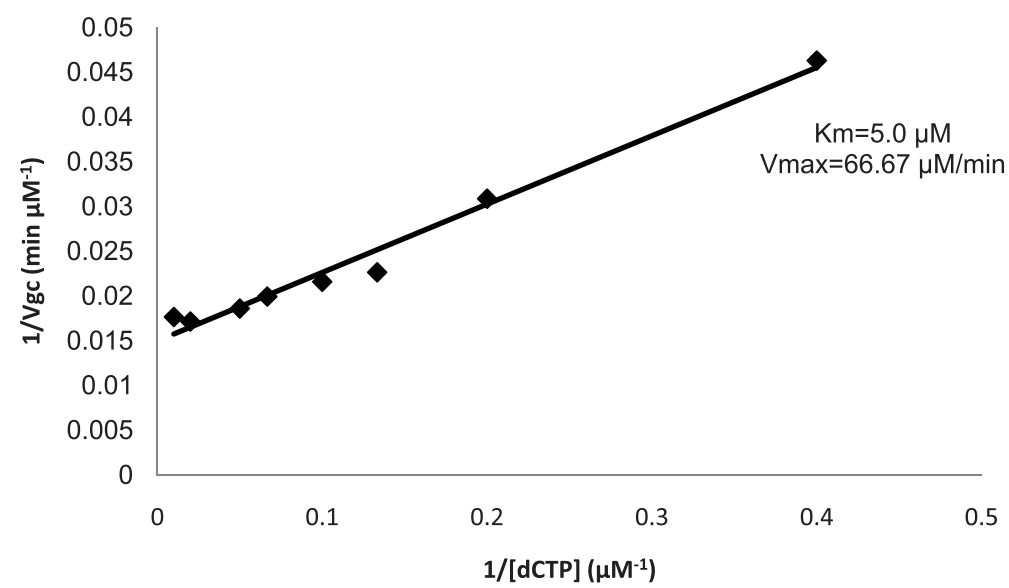

Supplement: f1 [file 285481.f1.pdf]
